# Supplementary material
Source: publisher figshare collection journal article supplement (https://gsajournals.figshare.com/ndownloader/files/23984849)
Supplement: Supplementary file 1 [file 23984849]

## Sheet: File S4
Family	Group	F002	F011	F091	F113	F117	F122	F126	F170	F173	F210	F213	F225	F247
GEN3_C001	G01	0.25	0.25	0.125	0	0	0	0.125	0	0.25	0	0	0	0
GEN3_C002	G01	0.25	0.25	0.125	0	0	0	0.125	0	0.125	0.125	0	0	0
GEN3_C003	G01	0.25	0.25	0.125	0	0	0	0.125	0	0.25	0	0	0	0
GEN3_C004	G01	0.25	0.25	0.125	0	0	0	0.125	0	0.125	0.125	0	0	0
GEN3_C005	G01	0.25	0.25	0.125	0	0	0	0.125	0	0.125	0.125	0	0	0
GEN3_C006	G01	0.25	0.25	0.125	0	0	0	0.125	0	0.25	0	0	0	0
GEN3_C007	G01	0.25	0.25	0.125	0	0	0	0.125	0	0.125	0.125	0	0	0
GEN3_C008	G01	0.25	0.25	0.125	0	0	0	0.125	0	0.25	0	0	0	0
GEN3_C009	G01	0.25	0.25	0.125	0	0	0	0.125	0	0.125	0.125	0	0	0
GEN3_C010	G02	0.125	0.25	0.25	0	0	0.125	0	0	0.125	0.125	0	0	0
GEN3_C011	G02	0.125	0.25	0.25	0	0	0.125	0	0	0.125	0.125	0	0	0
GEN3_C012	G02	0	0.25	0.25	0	0	0.125	0	0	0.125	0.125	0.125	0	0
GEN3_C013	G02	0	0.25	0.25	0	0	0.25	0	0	0.125	0.125	0	0	0
GEN3_C014	G02	0.125	0.25	0.25	0	0	0.125	0	0	0.125	0.125	0	0	0
GEN3_C015	G02	0	0.25	0.25	0	0	0.125	0	0	0.125	0.125	0.125	0	0
GEN3_C016	G02	0	0.25	0.25	0	0	0.125	0	0	0.125	0.125	0.125	0	0
GEN3_C017	G02	0.125	0.25	0.25	0	0	0.125	0	0	0.125	0.125	0	0	0
GEN3_C018	G02	0	0.25	0.25	0	0	0.25	0	0	0.125	0.125	0	0	0
GEN3_C019	G02	0.125	0.25	0.25	0	0	0.125	0	0	0.125	0.125	0	0	0
GEN3_C020	G02	0	0.25	0.25	0	0	0.125	0	0	0.125	0.125	0.125	0	0
GEN3_C021	G02	0	0.25	0.25	0	0	0.125	0	0	0.125	0.125	0.125	0	0
GEN3_C022	G02	0	0.25	0.25	0	0	0.125	0	0	0.125	0.125	0.125	0	0
GEN3_C023	G02	0.125	0.25	0.25	0	0	0.125	0	0	0.125	0.125	0	0	0
GEN3_C024	G02	0.125	0.25	0.25	0	0	0.125	0	0	0.125	0.125	0	0	0
GEN3_C025	G02	0	0.25	0.25	0	0	0.25	0	0	0.125	0.125	0	0	0
GEN3_C026	G02	0.125	0.25	0.25	0	0	0.125	0	0	0.125	0.125	0	0	0
GEN3_C027	G02	0.125	0.25	0.25	0	0	0.125	0	0	0.125	0.125	0	0	0
GEN3_C028	G02	0.125	0.25	0.25	0	0	0.125	0	0	0.125	0.125	0	0	0
GEN3_C029	G02	0	0.25	0.25	0	0	0.125	0	0	0.125	0.125	0.125	0	0
GEN3_C030	G02	0	0.25	0.25	0	0	0.25	0	0	0.125	0.125	0	0	0
GEN3_C031	G02	0	0.25	0.25	0	0	0.125	0	0	0.125	0.125	0.125	0	0
GEN3_C032	G02	0.125	0.25	0.25	0	0	0.125	0	0	0.125	0.125	0	0	0
GEN3_C033	G02	0	0.25	0.25	0	0	0.125	0	0	0.125	0.125	0.125	0	0
GEN3_C034	G02	0	0.25	0.25	0	0	0.25	0	0	0.125	0.125	0	0	0
GEN3_C035	G02	0.125	0.25	0.25	0	0	0.125	0	0	0.125	0.125	0	0	0
GEN3_C036	G02	0	0.25	0.25	0	0	0.125	0	0	0.125	0.125	0.125	0	0
GEN3_C037	G02	0	0.25	0.25	0	0	0.125	0	0	0.125	0.125	0.125	0	0
GEN3_C038	G02	0	0.25	0.25	0	0	0.125	0	0	0.125	0.125	0.125	0	0
GEN3_C039	G02	0	0.25	0.25	0	0	0.125	0	0	0.125	0.125	0.125	0	0
GEN3_C040	G02	0.125	0.25	0.25	0	0	0.125	0	0	0.125	0.125	0	0	0
GEN3_C041	G02	0.125	0.25	0.25	0	0	0.125	0	0	0.125	0.125	0	0	0
GEN3_C042	G02	0	0.25	0.25	0	0	0.125	0	0	0.125	0.125	0.125	0	0
GEN3_C043	G02	0	0.25	0.25	0	0	0.25	0	0	0.125	0.125	0	0	0
GEN3_C044	G03	0.125	0.25	0.25	0	0	0.125	0	0	0.25	0	0	0	0
GEN3_C045	G03	0	0.25	0.25	0	0	0.125	0	0	0.25	0	0.125	0	0
GEN3_C046	G03	0.125	0.25	0.25	0	0	0	0	0	0.25	0	0.125	0	0
GEN3_C047	G03	0	0.25	0.25	0	0	0.125	0	0	0.25	0	0.125	0	0
GEN3_C048	G03	0	0.25	0.25	0	0	0.125	0	0	0.25	0	0.125	0	0
GEN3_C049	G03	0	0.25	0.25	0	0	0.125	0	0	0.25	0	0.125	0	0
GEN3_C050	G03	0.125	0.25	0.25	0	0	0.125	0	0	0.25	0	0	0	0
GEN3_C051	G03	0.125	0.25	0.25	0	0	0	0	0	0.25	0	0.125	0	0
GEN3_C052	G03	0.125	0.25	0.25	0	0	0	0	0	0.25	0	0.125	0	0
GEN3_C053	G03	0	0.25	0.25	0	0	0.125	0	0	0.25	0	0.125	0	0
GEN3_C054	G03	0	0.25	0.25	0	0	0.125	0	0	0.25	0	0.125	0	0
GEN3_C055	G03	0.125	0.25	0.25	0	0	0.125	0	0	0.25	0	0	0	0
GEN3_C056	G03	0.125	0.25	0.25	0	0	0	0	0	0.25	0	0.125	0	0
GEN3_C057	G03	0.125	0.25	0.25	0	0	0	0	0	0.25	0	0.125	0	0
GEN3_C058	G03	0	0.25	0.25	0	0	0.125	0	0	0.25	0	0.125	0	0
GEN3_C059	G03	0	0.25	0.25	0	0	0.125	0	0	0.25	0	0.125	0	0
GEN3_C060	G04	0	0.25	0.125	0	0	0	0.125	0	0.25	0	0.25	0	0
GEN3_C061	G04	0	0.25	0.125	0	0	0	0.125	0	0.25	0	0.25	0	0
GEN3_C062	G04	0	0.25	0.25	0	0	0	0	0	0.125	0.125	0.25	0	0
GEN3_C063	G04	0	0.25	0.125	0	0	0	0.125	0	0.125	0.125	0.25	0	0
GEN3_C064	G04	0	0.25	0.125	0	0	0	0.125	0	0.125	0.125	0.25	0	0
GEN3_C065	G04	0	0.25	0.125	0	0	0	0.125	0	0.125	0.125	0.25	0	0
GEN3_C066	G04	0	0.25	0.25	0	0	0	0	0	0.125	0.125	0.25	0	0
GEN3_C067	G04	0	0.25	0.25	0	0	0	0	0	0.125	0.125	0.25	0	0
GEN3_C068	G04	0	0.25	0.125	0	0	0	0.125	0	0.25	0	0.25	0	0
GEN3_C069	G04	0	0.25	0.125	0	0	0	0.125	0	0.25	0	0.25	0	0
GEN3_C070	G04	0	0.25	0.25	0	0	0	0	0	0.125	0.125	0.25	0	0
GEN3_C071	G04	0	0.25	0.125	0	0	0	0.125	0	0.25	0	0.25	0	0
GEN3_C072	G04	0	0.25	0.125	0	0	0	0.125	0	0.125	0.125	0.25	0	0
GEN3_C073	G04	0	0.25	0.125	0	0	0	0.125	0	0.25	0	0.25	0	0
GEN3_C074	G04	0	0.25	0.125	0	0	0	0.125	0	0.125	0.125	0.25	0	0
GEN3_C075	G04	0	0.25	0.25	0	0	0	0	0	0.125	0.125	0.25	0	0
GEN3_C076	G04	0	0.25	0.125	0	0	0	0.125	0	0.25	0	0.25	0	0
GEN3_C077	G04	0	0.25	0.125	0	0	0	0.125	0	0.125	0.125	0.25	0	0
GEN3_C078	G04	0	0.25	0.125	0	0	0	0.125	0	0.125	0.125	0.25	0	0
GEN3_C079	G05	0	0.25	0.25	0	0	0.125	0	0	0	0.25	0.125	0	0
GEN3_C080	G05	0.125	0.25	0.25	0	0	0.125	0	0	0	0.25	0	0	0
GEN3_C081	G05	0.125	0.25	0.25	0	0	0.125	0	0	0	0.25	0	0	0
GEN3_C082	G05	0.125	0.25	0.25	0	0	0	0	0	0	0.25	0.125	0	0
GEN3_C083	G05	0	0.25	0.25	0	0	0.125	0	0	0	0.25	0.125	0	0
GEN3_C084	G05	0	0.25	0.25	0	0	0.125	0	0	0	0.25	0.125	0	0
GEN3_C085	G05	0	0.25	0.25	0	0	0.125	0	0	0	0.25	0.125	0	0
GEN3_C086	G05	0.125	0.25	0.25	0	0	0.125	0	0	0	0.25	0	0	0
GEN3_C087	G05	0.125	0.25	0.25	0	0	0	0	0	0	0.25	0.125	0	0
GEN3_C088	G05	0	0.25	0.25	0	0	0.125	0	0	0	0.25	0.125	0	0
GEN3_C089	G05	0.125	0.25	0.25	0	0	0.125	0	0	0	0.25	0	0	0
GEN3_C090	G05	0.125	0.25	0.25	0	0	0	0	0	0	0.25	0.125	0	0
GEN3_C091	G05	0.125	0.25	0.25	0	0	0	0	0	0	0.25	0.125	0	0
GEN3_C092	G05	0.125	0.25	0.25	0	0	0	0	0	0	0.25	0.125	0	0
GEN3_C093	G05	0	0.25	0.25	0	0	0.125	0	0	0	0.25	0.125	0	0
GEN3_C094	G05	0	0.25	0.25	0	0	0.125	0	0	0	0.25	0.125	0	0
GEN3_C095	G05	0.125	0.25	0.25	0	0	0.125	0	0	0	0.25	0	0	0
GEN3_C096	G05	0	0.25	0.25	0	0	0.125	0	0	0	0.25	0.125	0	0
GEN3_C097	G05	0.125	0.25	0.25	0	0	0	0	0	0	0.25	0.125	0	0
GEN3_C098	G05	0.125	0.25	0.25	0	0	0.125	0	0	0	0.25	0	0	0
GEN3_C099	G05	0.125	0.25	0.25	0	0	0.125	0	0	0	0.25	0	0	0
GEN3_C100	G05	0	0.25	0.25	0	0	0.125	0	0	0	0.25	0.125	0	0
GEN3_C101	G05	0	0.25	0.25	0	0	0.125	0	0	0	0.25	0.125	0	0
GEN3_C102	G05	0.125	0.25	0.25	0	0	0.125	0	0	0	0.25	0	0	0
GEN3_C103	G05	0	0.25	0.25	0	0	0.125	0	0	0	0.25	0.125	0	0
GEN3_C104	G06	0	0.125	0.125	0	0	0	0.25	0	0.25	0.125	0.125	0	0
GEN3_C105	G06	0	0.125	0.125	0	0	0	0.25	0	0.25	0.125	0.125	0	0
GEN3_C106	G06	0.125	0.125	0.125	0	0	0	0.25	0	0.25	0.125	0	0	0
GEN3_C107	G06	0.125	0.125	0.125	0	0	0	0.25	0	0.25	0.125	0	0	0
GEN3_C108	G06	0.125	0.125	0.125	0	0	0	0.25	0	0.25	0.125	0	0	0
GEN3_C109	G06	0	0.125	0.125	0	0	0	0.25	0	0.25	0.125	0.125	0	0
GEN3_C110	G06	0	0.125	0.125	0	0	0	0.25	0	0.25	0.125	0.125	0	0
GEN3_C111	G06	0.125	0.125	0.125	0	0	0	0.25	0	0.25	0.125	0	0	0
GEN3_C112	G06	0.125	0.125	0.125	0	0	0	0.25	0	0.25	0.125	0	0	0
GEN3_C113	G06	0.125	0.125	0.125	0	0	0	0.25	0	0.25	0.125	0	0	0
GEN3_C114	G06	0	0.125	0.125	0	0	0	0.25	0	0.25	0.125	0.125	0	0
GEN3_C115	G06	0	0.125	0.125	0	0	0	0.25	0	0.25	0.125	0.125	0	0
GEN3_C116	G06	0	0.125	0.125	0	0	0	0.25	0	0.25	0.125	0.125	0	0
GEN3_C117	G06	0	0.125	0.125	0	0	0	0.25	0	0.25	0.125	0.125	0	0
GEN3_C118	G06	0	0.125	0.125	0	0	0	0.25	0	0.25	0.125	0.125	0	0
GEN3_C119	G06	0	0.125	0.125	0	0	0	0.25	0	0.25	0.125	0.125	0	0
GEN3_C120	G07	0	0.25	0.125	0	0	0.125	0.125	0	0.125	0.125	0.125	0	0
GEN3_C121	G07	0.125	0.25	0.125	0	0	0	0.125	0	0.125	0.125	0.125	0	0
GEN3_C122	G07	0	0.25	0.125	0	0	0.125	0.125	0	0.125	0.125	0.125	0	0
GEN3_C123	G07	0.125	0.25	0.125	0	0	0	0.125	0	0.125	0.125	0.125	0	0
GEN3_C124	G07	0.125	0.25	0.125	0	0	0.125	0.125	0	0.125	0.125	0	0	0
GEN3_C125	G07	0.125	0.25	0.125	0	0	0.125	0.125	0	0.125	0.125	0	0	0
GEN3_C126	G07	0	0.25	0.125	0	0	0.125	0.125	0	0.125	0.125	0.125	0	0
GEN3_C127	G07	0.125	0.25	0.125	0	0	0	0.125	0	0.125	0.125	0.125	0	0
GEN3_C128	G07	0.125	0.25	0.125	0	0	0	0.125	0	0.125	0.125	0.125	0	0
GEN3_C129	G07	0	0.25	0.125	0	0	0.125	0.125	0	0.125	0.125	0.125	0	0
GEN3_C130	G07	0.125	0.25	0.125	0	0	0	0.125	0	0.125	0.125	0.125	0	0
GEN3_C131	G07	0	0.25	0.125	0	0	0.125	0.125	0	0.125	0.125	0.125	0	0
GEN3_C132	G07	0.125	0.25	0.125	0	0	0	0.125	0	0.125	0.125	0.125	0	0
GEN3_C133	G07	0.125	0.25	0.125	0	0	0	0.125	0	0.125	0.125	0.125	0	0
GEN3_C134	G07	0.125	0.25	0.125	0	0	0.125	0.125	0	0.125	0.125	0	0	0
GEN3_C135	G07	0.125	0.25	0.125	0	0	0.125	0.125	0	0.125	0.125	0	0	0
GEN3_C136	G07	0.125	0.25	0.125	0	0	0	0.125	0	0.125	0.125	0.125	0	0
GEN3_C137	G07	0.125	0.25	0.125	0	0	0.125	0.125	0	0.125	0.125	0	0	0
GEN3_C138	G07	0.125	0.25	0.125	0	0	0	0.125	0	0.125	0.125	0.125	0	0
GEN3_C139	G07	0	0.25	0.125	0	0	0.125	0.125	0	0.125	0.125	0.125	0	0
GEN3_C140	G07	0.125	0.25	0.125	0	0	0	0.125	0	0.125	0.125	0.125	0	0
GEN3_C141	G07	0.125	0.25	0.125	0	0	0	0.125	0	0.125	0.125	0.125	0	0
GEN3_C142	G07	0.125	0.25	0.125	0	0	0.125	0.125	0	0.125	0.125	0	0	0
GEN3_C143	G07	0.125	0.25	0.125	0	0	0	0.125	0	0.125	0.125	0.125	0	0
GEN3_C144	G07	0	0.25	0.125	0	0	0.125	0.125	0	0.125	0.125	0.125	0	0
GEN3_C145	G07	0	0.25	0.125	0	0	0.125	0.125	0	0.125	0.125	0.125	0	0
GEN3_C146	G07	0	0.25	0.125	0	0	0.125	0.125	0	0.125	0.125	0.125	0	0
GEN3_C147	G07	0	0.25	0.125	0	0	0.125	0.125	0	0.125	0.125	0.125	0	0
GEN3_C148	G07	0.125	0.25	0.125	0	0	0	0.125	0	0.125	0.125	0.125	0	0
GEN3_C149	G07	0	0.25	0.125	0	0	0.125	0.125	0	0.125	0.125	0.125	0	0
GEN3_C150	G07	0.125	0.25	0.125	0	0	0	0.125	0	0.125	0.125	0.125	0	0
GEN3_C151	G08	0.125	0.125	0.25	0	0	0	0.125	0	0.25	0.125	0	0	0
GEN3_C152	G08	0	0.125	0.25	0	0	0.125	0.125	0	0.25	0.125	0	0	0
GEN3_C153	G08	0	0.125	0.25	0	0	0	0.125	0	0.25	0.125	0.125	0	0
GEN3_C154	G08	0	0.125	0.25	0	0	0	0.125	0	0.25	0.125	0.125	0	0
GEN3_C155	G08	0	0.125	0.25	0	0	0.125	0.125	0	0.25	0.125	0	0	0
GEN3_C156	G08	0	0.125	0.25	0	0	0.125	0.125	0	0.25	0.125	0	0	0
GEN3_C157	G08	0.125	0.125	0.25	0	0	0	0.125	0	0.25	0.125	0	0	0
GEN3_C158	G08	0	0.125	0.25	0	0	0.125	0.125	0	0.25	0.125	0	0	0
GEN3_C159	G08	0.125	0.125	0.25	0	0	0	0.125	0	0.25	0.125	0	0	0
GEN3_C160	G08	0.125	0.125	0.25	0	0	0	0.125	0	0.25	0.125	0	0	0
GEN3_C161	G08	0.125	0.125	0.25	0	0	0	0.125	0	0.25	0.125	0	0	0
GEN3_C162	G08	0	0.125	0.25	0	0	0.125	0.125	0	0.25	0.125	0	0	0
GEN3_C163	G08	0	0.125	0.25	0	0	0	0.125	0	0.25	0.125	0.125	0	0
GEN3_C164	G08	0	0.125	0.25	0	0	0	0.125	0	0.25	0.125	0.125	0	0
GEN3_C165	G08	0	0.125	0.25	0	0	0.125	0.125	0	0.25	0.125	0	0	0
GEN3_C166	G08	0.125	0.125	0.25	0	0	0	0.125	0	0.25	0.125	0	0	0
GEN3_C167	G09	0	0.125	0.25	0	0	0	0.125	0	0.125	0.25	0.125	0	0
GEN3_C168	G09	0	0.125	0.25	0	0	0	0.125	0	0.125	0.25	0.125	0	0
GEN3_C169	G09	0	0.125	0.25	0	0	0	0.125	0	0.125	0.25	0.125	0	0
GEN3_C170	G09	0	0.125	0.25	0	0	0.125	0.125	0	0.125	0.25	0	0	0
GEN3_C171	G09	0	0.125	0.25	0	0	0	0.125	0	0.125	0.25	0.125	0	0
GEN3_C172	G09	0.125	0.125	0.25	0	0	0	0.125	0	0.125	0.25	0	0	0
GEN3_C173	G09	0	0.125	0.25	0	0	0	0.125	0	0.125	0.25	0.125	0	0
GEN3_C174	G09	0.125	0.125	0.25	0	0	0	0.125	0	0.125	0.25	0	0	0
GEN3_C175	G09	0.125	0.125	0.25	0	0	0	0.125	0	0.125	0.25	0	0	0
GEN3_C176	G09	0.125	0.125	0.25	0	0	0	0.125	0	0.125	0.25	0	0	0
GEN3_C177	G09	0	0.125	0.25	0	0	0.125	0.125	0	0.125	0.25	0	0	0
GEN3_C178	G09	0.125	0.125	0.25	0	0	0	0.125	0	0.125	0.25	0	0	0
GEN3_C179	G09	0	0.125	0.25	0	0	0.125	0.125	0	0.125	0.25	0	0	0
GEN3_C180	G09	0.125	0.125	0.25	0	0	0	0.125	0	0.125	0.25	0	0	0
GEN3_C181	G09	0.125	0.125	0.25	0	0	0	0.125	0	0.125	0.25	0	0	0
GEN3_C182	G09	0	0.125	0.25	0	0	0.125	0.125	0	0.125	0.25	0	0	0
GEN3_C183	G09	0	0.125	0.25	0	0	0.125	0.125	0	0.125	0.25	0	0	0
GEN3_C184	G09	0	0.125	0.25	0	0	0	0.125	0	0.125	0.25	0.125	0	0
GEN3_C185	G09	0	0.125	0.25	0	0	0.125	0.125	0	0.125	0.25	0	0	0
GEN3_C186	G09	0	0.125	0.25	0	0	0.125	0.125	0	0.125	0.25	0	0	0
GEN3_C187	G10	0.125	0.25	0.125	0	0	0	0.125	0	0.25	0	0.125	0	0
GEN3_C188	G10	0.125	0.25	0.125	0	0	0	0.125	0	0.25	0	0.125	0	0
GEN3_C189	G10	0	0.25	0.125	0	0	0.125	0.125	0	0.25	0	0.125	0	0
GEN3_C190	G10	0.125	0.25	0.125	0	0	0	0.125	0	0.25	0	0.125	0	0
GEN3_C191	G10	0	0.25	0.125	0	0	0.125	0.125	0	0.25	0	0.125	0	0
GEN3_C192	G10	0.125	0.25	0.125	0	0	0.125	0.125	0	0.25	0	0	0	0
GEN3_C193	G10	0.125	0.25	0.125	0	0	0	0.125	0	0.25	0	0.125	0	0
GEN3_C194	G10	0.125	0.25	0	0	0	0	0.25	0	0.25	0	0.125	0	0
GEN3_C195	G10	0.125	0.25	0.125	0	0	0	0.125	0	0.25	0	0.125	0	0
GEN3_C196	G10	0.125	0.25	0.125	0	0	0	0.125	0	0.25	0	0.125	0	0
GEN3_C197	G10	0.125	0.25	0.125	0	0	0	0.125	0	0.25	0	0.125	0	0
GEN3_C198	G10	0.125	0.25	0	0	0	0	0.25	0	0.25	0	0.125	0	0
GEN3_C199	G10	0.125	0.25	0.125	0	0	0	0.125	0	0.25	0	0.125	0	0
GEN3_C200	G10	0.125	0.25	0	0	0	0	0.25	0	0.25	0	0.125	0	0
GEN3_C201	G10	0.125	0.25	0.125	0	0	0.125	0.125	0	0.25	0	0	0	0
GEN3_C202	G10	0.125	0.25	0.125	0	0	0	0.125	0	0.25	0	0.125	0	0
GEN3_C203	G10	0.125	0.25	0.125	0	0	0.125	0.125	0	0.25	0	0	0	0
GEN3_C204	G10	0	0.25	0.125	0	0	0.125	0.125	0	0.25	0	0.125	0	0
GEN3_C205	G10	0.125	0.25	0.125	0	0	0.125	0.125	0	0.25	0	0	0	0
GEN3_C206	G10	0.125	0.25	0	0	0	0	0.25	0	0.25	0	0.125	0	0
GEN3_C207	G10	0.125	0.25	0.125	0	0	0	0.125	0	0.25	0	0.125	0	0
GEN3_C208	G10	0.125	0.25	0.125	0	0	0	0.125	0	0.25	0	0.125	0	0
GEN3_C209	G10	0.125	0.25	0.125	0	0	0.125	0.125	0	0.25	0	0	0	0
GEN3_C210	G10	0.125	0.25	0.125	0	0	0	0.125	0	0.25	0	0.125	0	0
GEN3_C211	G10	0.125	0.25	0.125	0	0	0	0.125	0	0.25	0	0.125	0	0
GEN3_C212	G11	0.25	0.25	0.25	0	0	0	0	0	0.125	0.125	0	0	0
GEN3_C213	G11	0.125	0.25	0.25	0	0	0	0	0	0.125	0.125	0.125	0	0
GEN3_C214	G11	0.25	0.25	0.25	0	0	0	0	0	0.125	0.125	0	0	0
GEN3_C215	G11	0.25	0.25	0.25	0	0	0	0	0	0.125	0.125	0	0	0
GEN3_C216	G11	0.125	0.25	0.25	0	0	0	0	0	0.125	0.125	0.125	0	0
GEN3_C217	G11	0.125	0.25	0.25	0	0	0	0	0	0.125	0.125	0.125	0	0
GEN3_C218	G11	0.125	0.25	0.25	0	0	0	0	0	0.125	0.125	0.125	0	0
GEN3_C219	G11	0.25	0.25	0.25	0	0	0	0	0	0.125	0.125	0	0	0
GEN3_C220	G11	0.125	0.25	0.25	0	0	0	0	0	0.125	0.125	0.125	0	0
GEN3_C221	G11	0.125	0.25	0.25	0	0	0	0	0	0.125	0.125	0.125	0	0
GEN3_C222	G11	0.125	0.25	0.25	0	0	0	0	0	0.125	0.125	0.125	0	0
GEN3_C223	G11	0.125	0.25	0.25	0	0	0	0	0	0.125	0.125	0.125	0	0
GEN3_C224	G11	0.125	0.25	0.25	0	0	0	0	0	0.125	0.125	0.125	0	0
GEN3_C225	G11	0.25	0.25	0.25	0	0	0	0	0	0.125	0.125	0	0	0
GEN3_C226	G11	0.125	0.25	0.25	0	0	0	0	0	0.125	0.125	0.125	0	0
GEN3_C227	G11	0.125	0.25	0.25	0	0	0	0	0	0.125	0.125	0.125	0	0
GEN3_C228	G11	0.25	0.25	0.25	0	0	0	0	0	0.125	0.125	0	0	0
GEN3_C229	G11	0.25	0.25	0.25	0	0	0	0	0	0.125	0.125	0	0	0
GEN3_C230	G11	0.125	0.25	0.25	0	0	0	0	0	0.125	0.125	0.125	0	0
GEN3_C231	G11	0.125	0.25	0.25	0	0	0	0	0	0.125	0.125	0.125	0	0
GEN3_C232	G12	0	0	0	0.125	0.125	0	0	0.25	0	0.125	0	0.125	0.25
GEN3_C233	G12	0	0	0	0.125	0.125	0	0	0.25	0	0.125	0	0.125	0.25
GEN3_C234	G12	0	0	0	0.125	0.125	0	0	0.25	0	0.125	0	0.125	0.25
GEN3_C235	G12	0	0	0	0.125	0.125	0	0	0.25	0	0.125	0	0.125	0.25
GEN3_C236	G12	0	0	0	0.125	0.125	0	0	0.25	0	0.125	0	0.125	0.25
GEN3_C237	G12	0	0	0	0.125	0.125	0	0	0.25	0	0.125	0	0.125	0.25
GEN3_C238	G12	0	0	0	0.125	0.125	0	0	0.25	0	0.125	0	0.125	0.25
GEN3_C239	G12	0	0	0	0.125	0.125	0	0	0.25	0	0.125	0	0.125	0.25
GEN3_C240	G12	0	0	0	0.125	0.125	0	0	0.25	0	0.125	0	0.125	0.25
GEN3_C241	G12	0	0	0	0	0	0	0	0.5	0	0	0	0	0.5
GEN3_C242	G12	0	0	0	0.125	0.125	0	0	0.25	0	0.125	0	0.125	0.25
GEN3_C243	G12	0	0	0	0.125	0.125	0	0	0.25	0	0.125	0	0.125	0.25
GEN3_C244	G12	0	0	0	0.125	0.125	0	0	0.25	0	0.125	0	0.125	0.25
GEN3_C245	G12	0	0	0	0.125	0.125	0	0	0.25	0	0.125	0	0.125	0.25
GEN3_C246	G12	0	0	0	0.125	0.125	0	0	0.25	0	0.125	0	0.125	0.25
GEN3_C247	G12	0	0	0	0.125	0.125	0	0	0.25	0	0.125	0	0.125	0.25
GEN3_C248	G12	0	0	0	0.125	0.125	0	0	0.25	0	0.125	0	0.125	0.25
GEN3_C249	G12	0	0	0	0.125	0.125	0	0	0.25	0	0.125	0	0.125	0.25
GEN3_C250	G12	0	0	0	0.125	0.125	0	0	0.25	0	0.125	0	0.125	0.25
GEN3_C251	G13	0	0	0	0.25	0.25	0	0	0	0	0.25	0	0.25	0
GEN3_C252	G13	0	0	0	0.25	0.25	0	0	0	0	0.25	0	0.25	0
GEN3_C253	G13	0	0	0	0.25	0.25	0	0	0	0	0.25	0	0.25	0
GEN3_C254	G13	0	0	0	0.25	0.25	0	0	0	0	0.25	0	0.25	0
GEN3_C255	G13	0	0	0	0.25	0.25	0	0	0	0	0.25	0	0.25	0
GEN3_C256	G13	0	0	0	0.25	0.25	0	0	0	0	0.25	0	0.25	0
GEN3_C257	G13	0	0	0	0.25	0.25	0	0	0	0	0.25	0	0.25	0
GEN3_C258	G13	0	0	0	0.25	0.25	0	0	0	0	0.25	0	0.25	0
GEN3_C259	G13	0	0	0	0.25	0.25	0	0	0	0	0.25	0	0.25	0
